# Supplementary material for: Cambogin exerts anti-proliferative and pro-apoptotic effects on breast adenocarcinoma through the induction of NADPH oxidase 1 and the alteration of mitochondrial morphology and dynamics
Source: PubMed Central journal article supplement (PMC5226606; doi:10.18632/oncotarget.10585), 2016-07-13
Supplement: oncotarget-07-50596-s001.pdf [file oncotarget-07-50596-s001.pdf]

## Cambogin exerts anti-proliferative and pro-apoptotic effects on breast adenocarcinoma through the induction of NADPH oxidase 1 and the alteration of mitochondrial morphology and dynamics

### SUPPLEMENTARY FIGURES

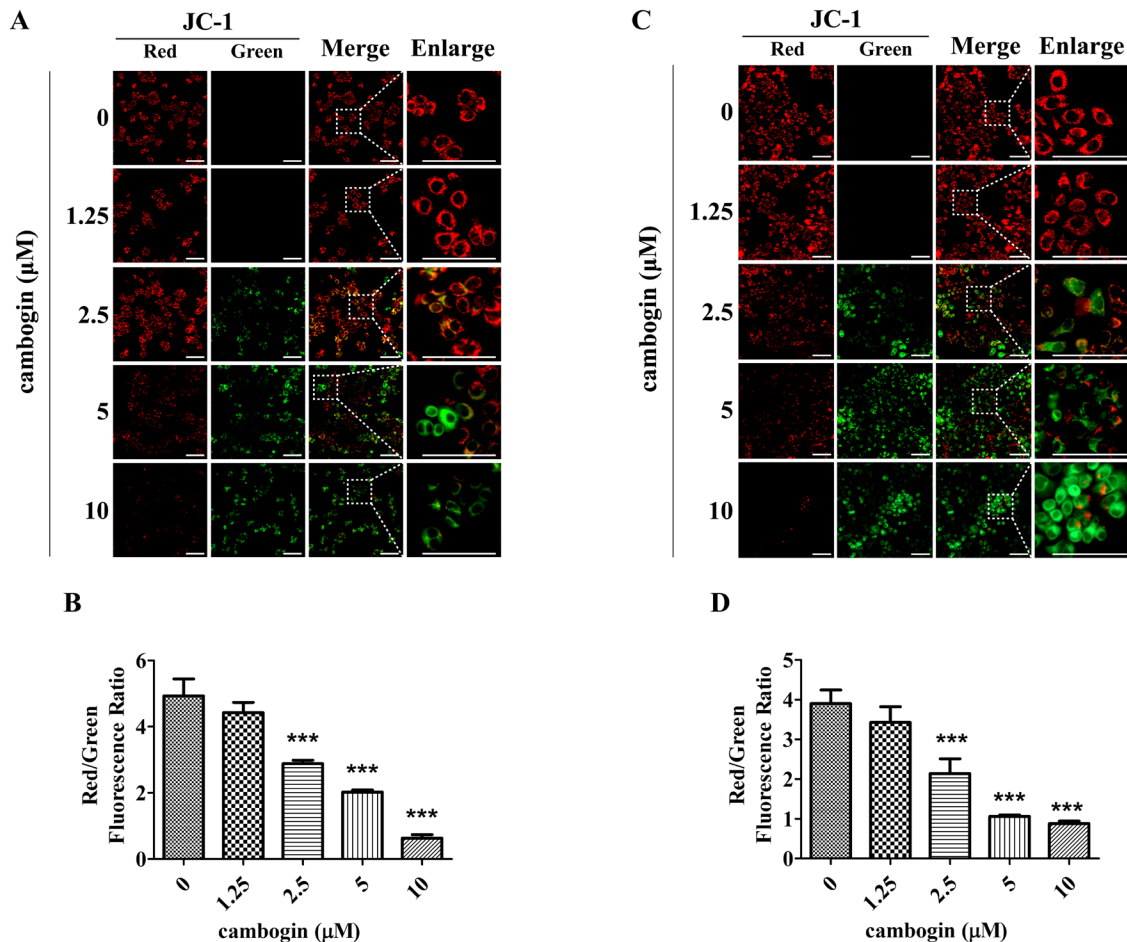

**Supplementary Figure S1: Cambogin induces the depolarization of mitochondrial transmembrane potential in breast cancer cells.** **A, B.** MDA-MB-468 cells were exposed to cambogin (0-10 μM) for 4 h. The percentage of cells with a reduction in  $\Delta\Psi_m$  was measured using the fluorescent dye JC-1 (10 μM). After incubation, stained cells were observed under an inverted fluorescent microscope (A) and were measured by microplate fluorescence reader (B). JC-1 dye changes color as the membrane potential increases. At higher membrane potentials, JC-1 forms aggregates, which changes the fluorescence emission color from green to red. Scale bar=100 μm. **C, D.** SK-BR-3 cells were exposed to cambogin (0-10 μM) for 4 h. The percentage of cells with a reduction in  $\Delta\Psi_m$  was measured using the fluorescent dye JC-1 (10 μM). After incubation, stained cells were observed under an inverted fluorescent microscope (C) and were measured by microplate fluorescence reader (D). JC-1 dye changes color as the membrane potential increases. At higher membrane potentials, JC-1 forms aggregates, which changes the fluorescence emission color from green to red. Scale bar=100 μm. Data are shown as means±SEM; \*\*\* $P$ <0.001 compared with control.  $n=3$ .

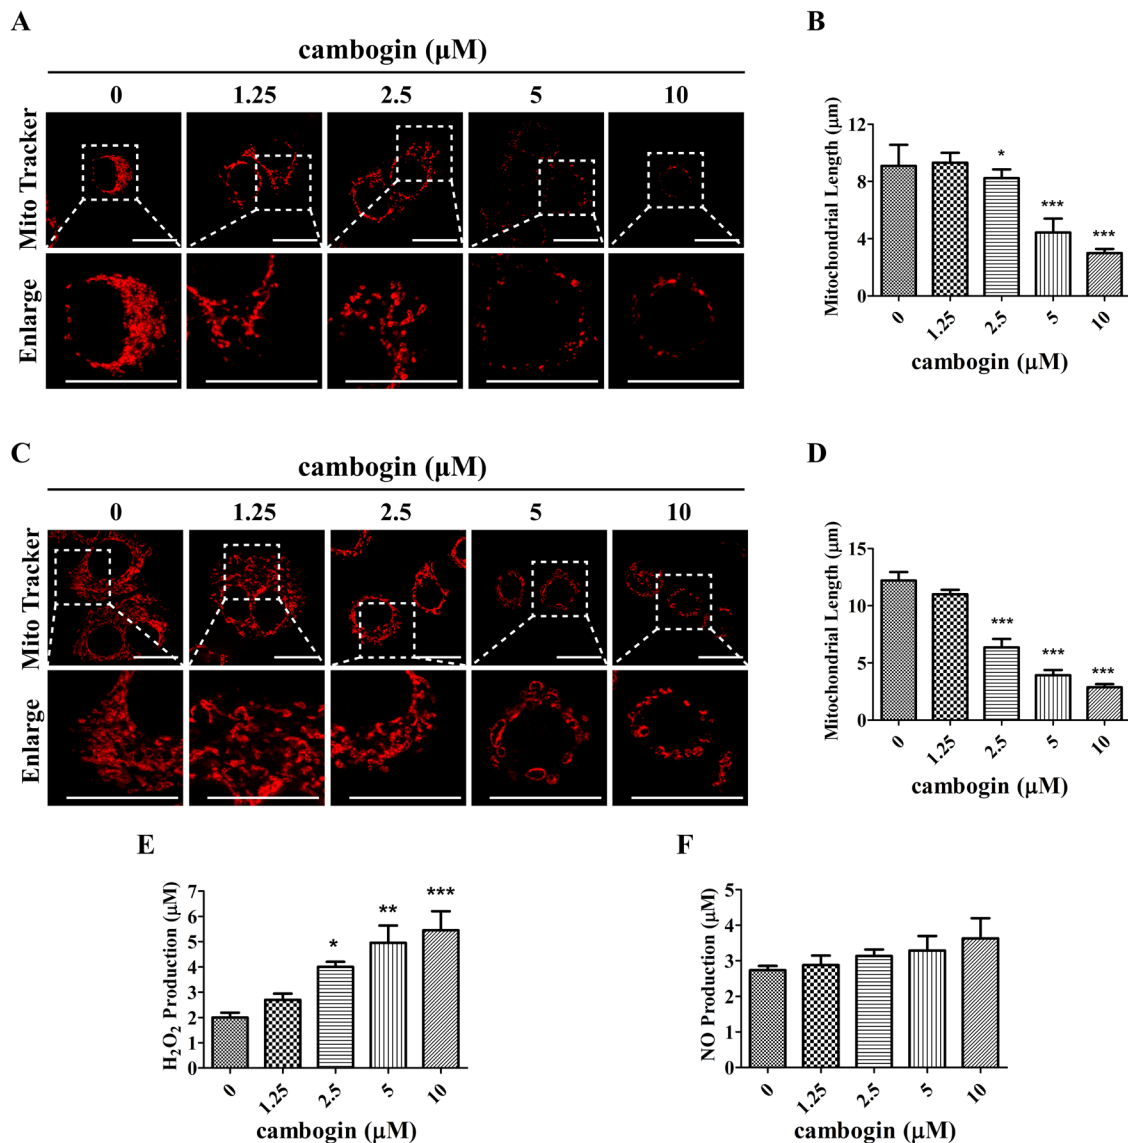

**Supplementary Figure S2: Cambogin modulates mitochondrial network in breast cancer cells.** A. MDA-MB-468 cells were treated with cambogin (0-10  $\mu\text{M}$ ) for 24 h. After treatment, the cells were washed, stained with MitoTracker Red for 1 h, washed again, and analyzed for mitochondrial network under confocal microscopy ( $\times 1000$ ). Scale bar=20  $\mu\text{m}$ . B. Statistical analyses of the average mitochondrial length for experiment A. C. SK-BR-3 cells were treated with cambogin (0-10  $\mu\text{M}$ ) for 24 h. After treatment, the cells were washed, stained with MitoTracker Red for 1 h, washed again, and analyzed for mitochondrial network under confocal microscopy ( $\times 1000$ ). Scale bar=20  $\mu\text{m}$ . D. Statistical analyses of the average mitochondrial length for experiment C. E. MCF-7 cells were treated with cambogin (0-10  $\mu\text{M}$ ) for 2 h. The production of  $\text{H}_2\text{O}_2$  was measured using  $\text{H}_2\text{O}_2$  kit as Material and Methods described. F. MCF-7 cells were treated with cambogin (0-10  $\mu\text{M}$ ) for 2 h. The cellular production of NO was determined with Griess reagent assay. Data are shown as means $\pm$ SEM; \* $P$ <0.05, \*\* $P$ <0.01, \*\*\* $P$ <0.001 compared with control.  $n$ =3.

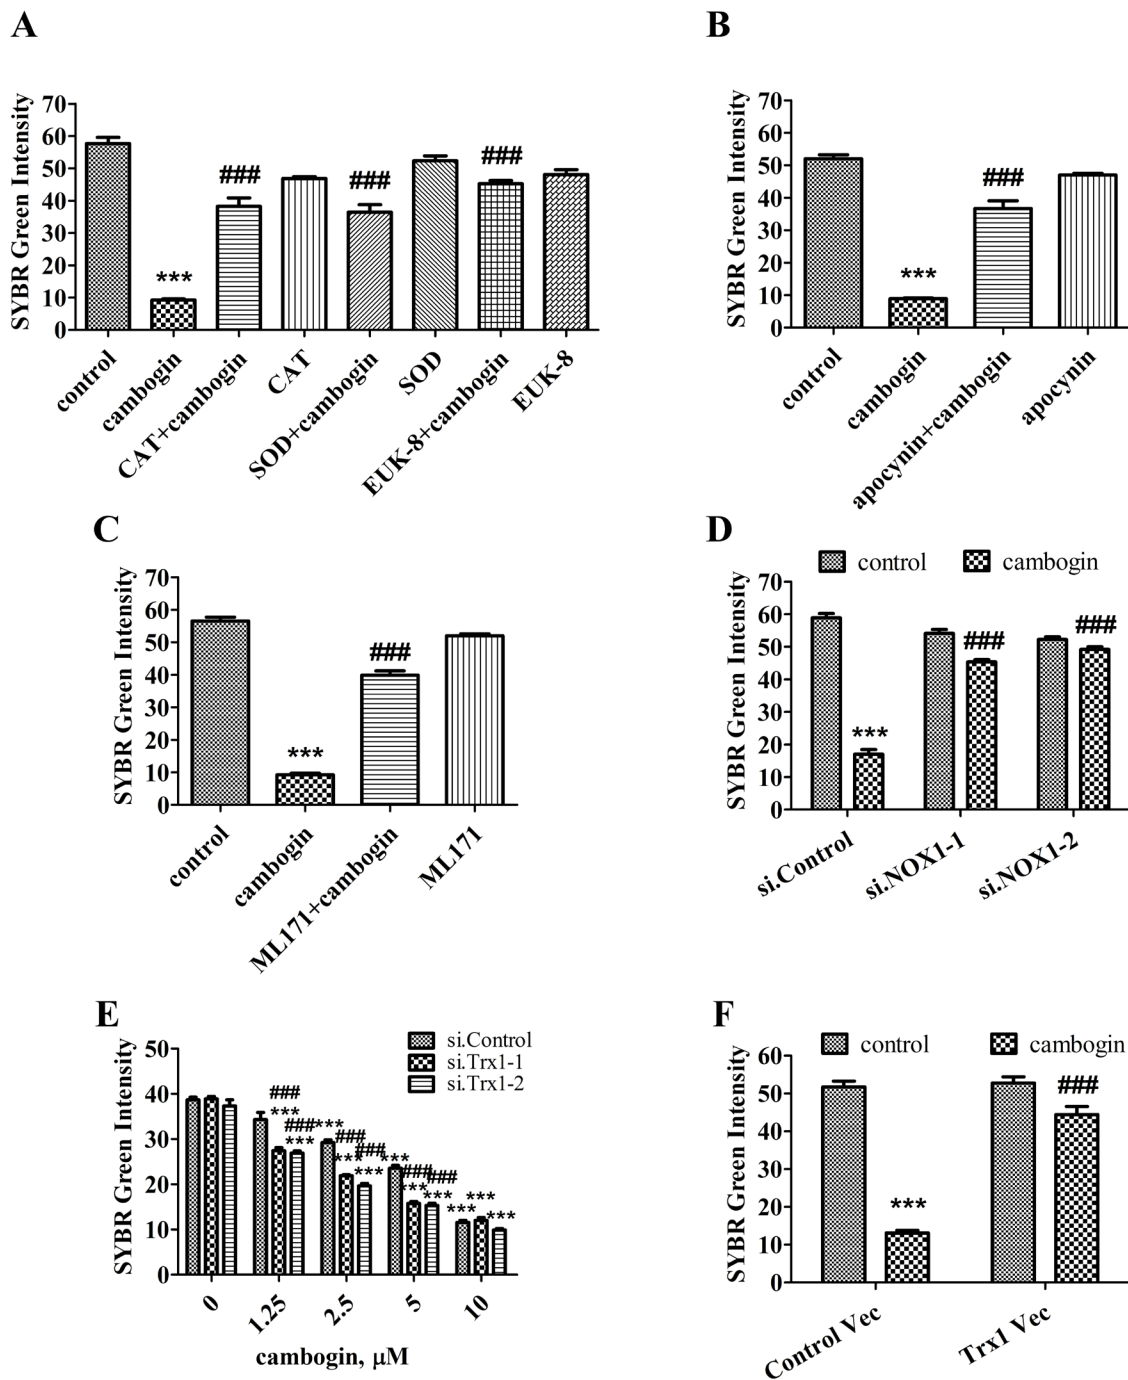

**Supplementary Figure S3: The reduction in cell viability evoked by cambogin can be rescued by antioxidants, knocking down Nox1, or over-expressing Trx1.** A. MCF-7 cells were treated with cambogin for 24 h after pretreatment with CAT (1000 U/ml), SOD (100 U/ml), and EUK-8 (50  $\mu$ M) for 2 h. B. MCF-7 cells were treated with cambogin for 24 h after pretreatment with apocynin (500  $\mu$ M) for 2 h. C. MCF-7 cells were treated with cambogin for 24 h after pretreatment with ML171 (20  $\mu$ M) for 2 h. D. MCF-7 cells were treated with cambogin for 24 h after transiently transfected with two independent NOX1 siRNAs (si.NOX1-1 and si.NOX1-2) or control scrambled siRNA (si.Control). E. MCF-7 cells were treated with cambogin for 24 h after transiently transfected with two independent Trx1 siRNAs (si.Trx1-1 and si.Trx1-2) or control scrambled siRNA (si.Control). F. MCF-7 cells were treated with cambogin for 24 h after transiently transfected with Trx1 plasmid (Trx1 Vec) or control plasmid (Control Vec). Cell viability was measured by SYBR Green assay. Data are shown as means $\pm$ SEM; \*\*\* $P$ <0.001 compared with control, ### $P$ <0.001 compared with cambogin-treated cells.  $n$ =3.

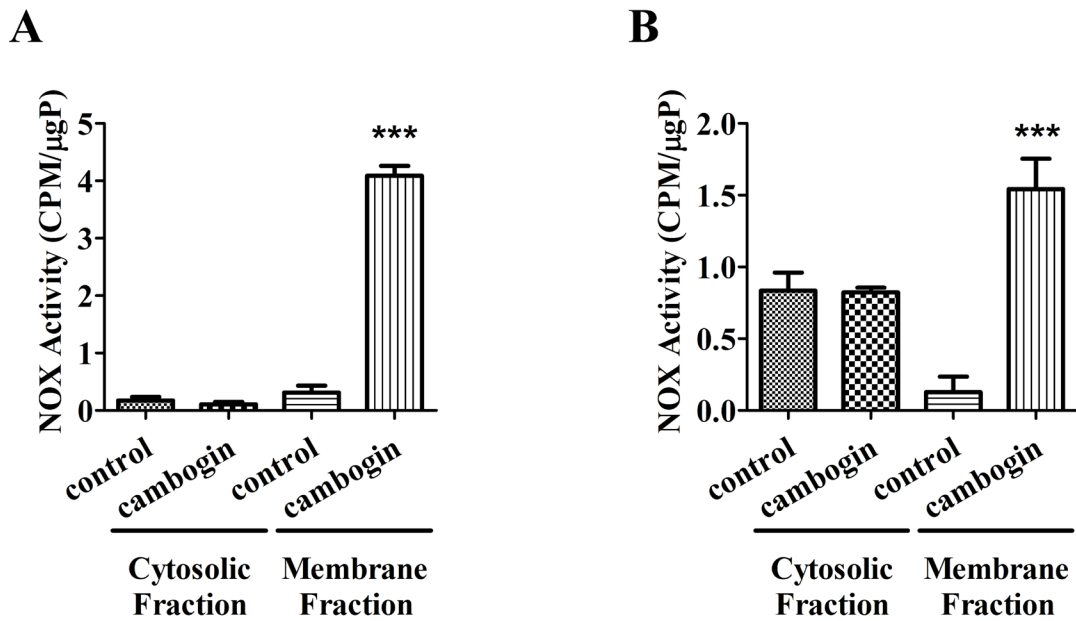

**Supplementary Figure S4: Cambogin evokes an increase in NOX activity in the membrane fractions of breast cancer cells. A, B.** Breast cancer cells were incubated in the absence or presence of cambogin (10  $\mu$ M) for 2 h in MDA-MB-468 (A) and SK-BR-3 (B) NOX activity was measured and the enzyme activity is expressed as relative light units (RLU). Data are shown as means $\pm$ SEM; \*\*\* $P$ <0.001 compared with control.  $n$ =3.
